# Supplementary material for: Biaxial strain engineering of atomically thin MoS₂ for highly reversible Li–CO₂ batteries
Source: Research Square preprint supplement (doi:10.21203/rs.3.rs-8285433/v1), 2025-12-23
Supplement: Supplementary file 1 [file 41a1cb294931dd4f3cc434f9.docx]

**Supporting Informantion**

**Biaxial strain engineering of atomically thin MoS2 for highly** **reversible Li-CO2 batteries**

*Min Wang1**#, Hucheng Song#*2, Junnan Han1#, Zehui Zhang1,Shieji Yang2, Zhihuan Li1,Gungbin Zhang2, Changshun Wang2, Jing Wu2, Linglong Zhang2,* *Zhongwei Yu3, Pei Zhang4, Dongke Li5, Yijie Liu6, Sixie Yang6, Linwei Yu1, Jun Xu*13*

1School of Electronics Science and Engineering, National Laboratory of Solid State Microstructures and Collaborative Innovation Center of Advanced Microstructures, Nanjing University, Nanjing, 210093, P. R. China

2 School of Physics, Nanjing University of Aeronautics and Astronautics, Nanjing, 210093, China

3 School of Microelectronics, School of Physics, Nantong University, 226019, China

4 College of Electrical and Information Engineering, Zhengzhou University of Light Industry, Zhengzhou 450000, China

5 ZJU-Hangzhou Global Scientific and Technological Innovation Center, State Key Laboratory of Silicon and Advanced Semiconductor Materials, School of Materials Science and Engineering, Zhejiang University, Hangzhou, 311200, China.

6 Center of Energy Storage Materials and Technology, College of Engineering and Applied Sciences, National Laboratory of Solid-State Microstructures and Collaborative Innovation Center of Advanced Microstructures, Nanjing University, Nanjing, China

***#*** *These authors contributed equally to this work.*

****Correspondence to:*** *hcsong@nuaa.edu.cn; junxu@nju.edu.cn*


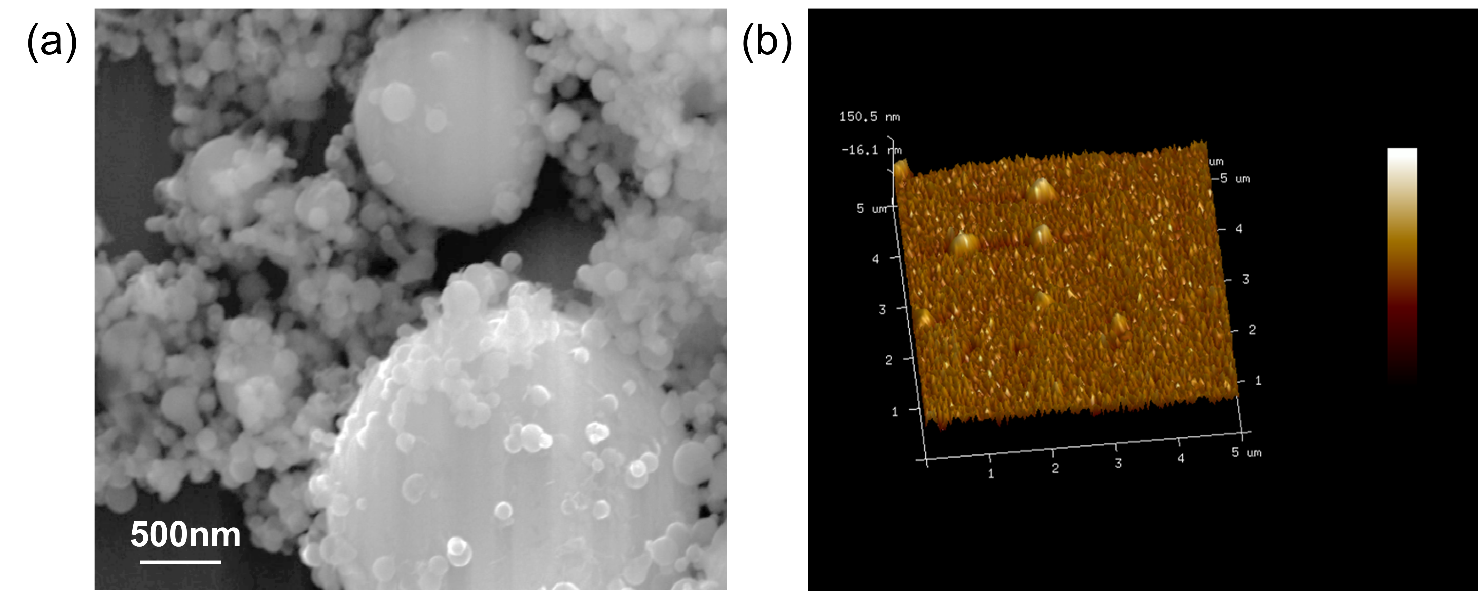


**Fig.S1.** SEM and AFM image of Al@MoS₂

Morphological Characterization. Fig. S1 shows the SEM and AFM image of Al@MoS₂. The size and morphology of the prepared Al@MoS₂ nanoparticles were examined using scanning electron microscopy (SEM, Hitachi SU-8010) and atomic force microscopy (AFM, Bruker Dimension Icon, tapping mode). For SEM analysis, the powder sample was dispersed on conductive carbon tape. The AFM sample was prepared by drop-casting a diluted ethanol dispersion (0.1 mg mL⁻¹) onto a freshly cleaved mica substrate, followed by ambient drying. As depicted in Figure S1, the SEM image reveals uniformly dispersed nanoparticles with a spherical morphology and a scale bar of 500 nm. Consistent with the SEM observation, the AFM analysis shows a near-circular lateral geometry with an average particle diameter of 150.5 nm. The results are consistent with the particle size distribution(see Fig. 2c). Cross-sectional analysis along the line in the AFM image further validates the uniform dimensions and good substrate dispersion without significant aggregation.


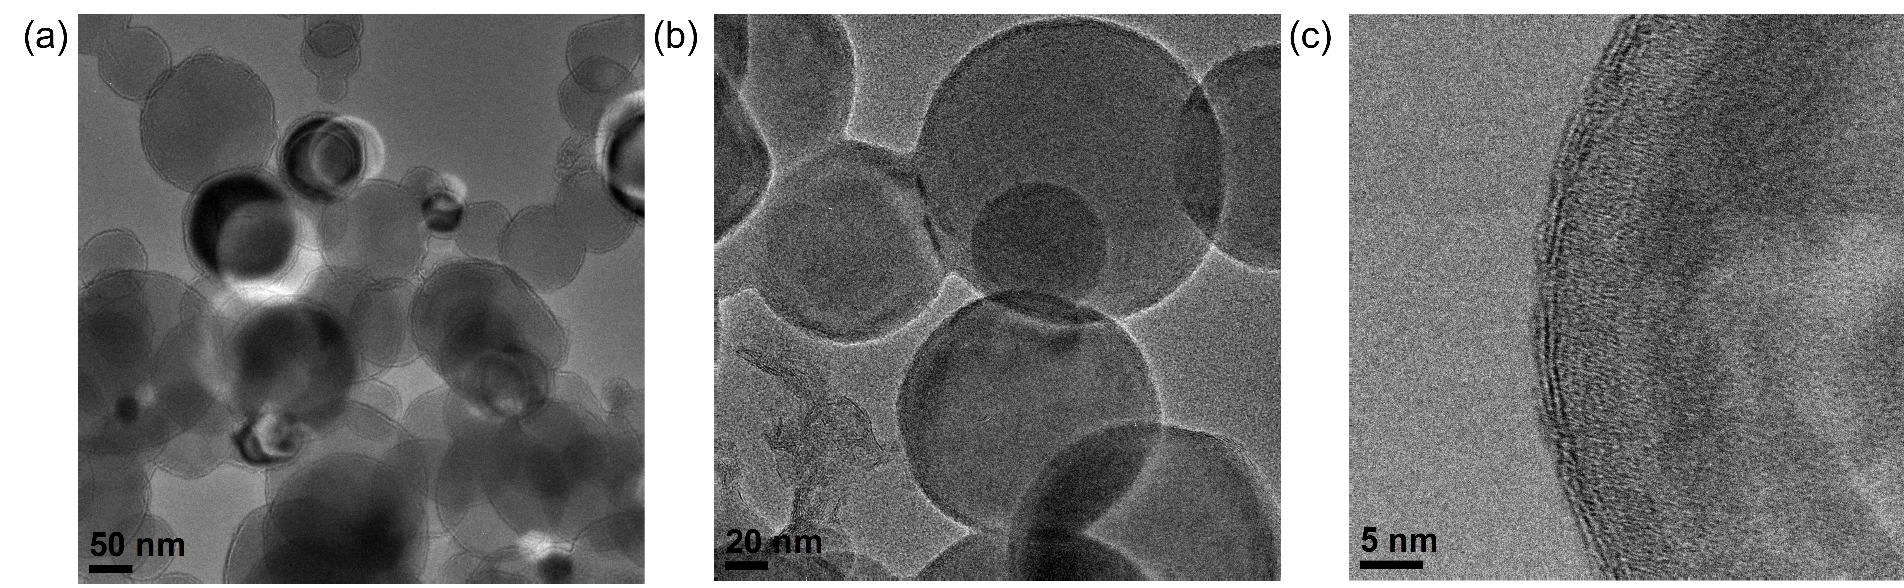


**Fig.S2.** TEM images of spherical MoS₂@Al at different scales.

Fig.S2 establishes a hierarchical TEM metrology suite with 100 nm, 50 nm, and 5 nm calibration scales, complementing the 500 nm and 20 nm references in the main text to ensure rigorous dimensional traceability across all magnifications. The 100 nm and 50 nm scale images reveal the particles as monodispersed, intact spherical architectures, enabling precise quantification of overall particle dimensions and statistical analysis of size distribution. Critically, the 5 nm high-resolution micrograph definitively resolves the tri-layer Al/Al₂O₃/MoS₂ core-shell structure, distinctly visualizing the crystalline Al core, the conformal amorphous Al₂O₃ passivation interlayer (~2–3 nm thickness). This systematic multi-scale approach furnishes seamless correlation between mesoscopic particle morphology and atomic-level interfacial registry, providing indispensable metrological validation for the structural model proposed herein.


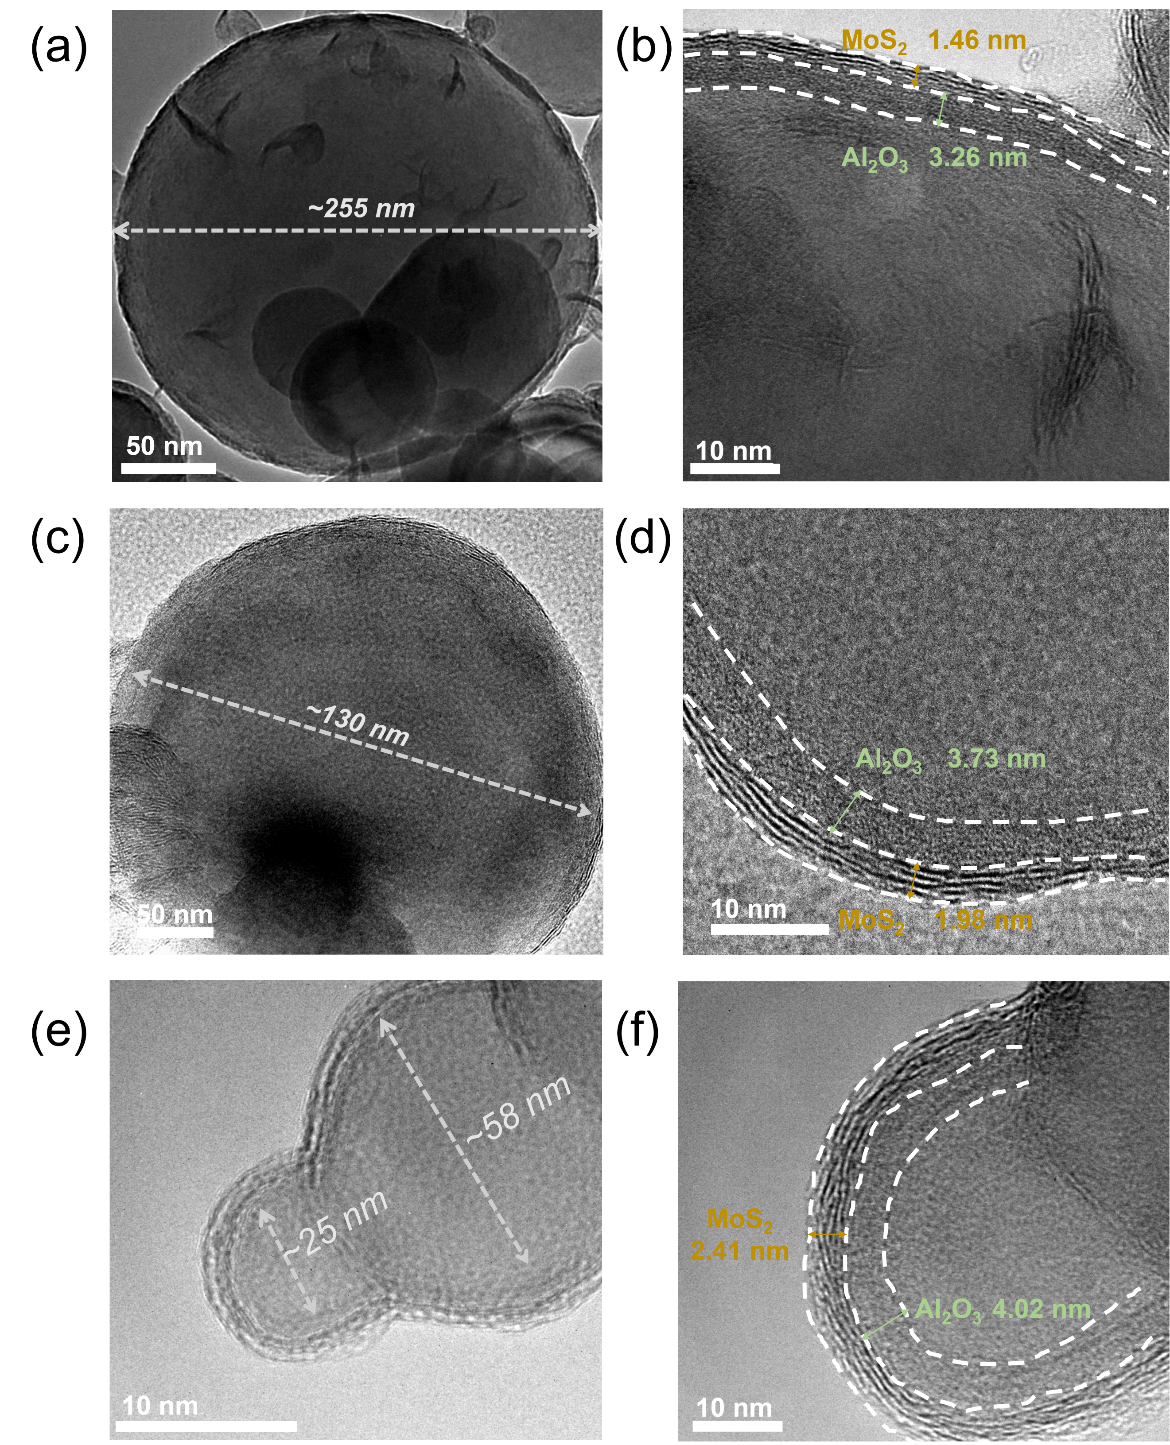


**Fig.S3.** TEM images of different particle sizes ofAl@MoS₂

Transmission Electron Microscopy (TEM) Analysis. Fig. S2 shows the TEM image of Al@MoS₂. The core-shell structure of Al@MoS₂ nanoparticles was investigated using high-resolution transmission electron microscopy (TEM, JEOL JEM-2100F, operating at 200 kV). A drop of diluted ethanol dispersion was deposited onto a carbon-coated copper grid and air-dried prior to imaging. As shown in Figure S2, three distinct particle size populations were observed, confirming a broad size distribution. For the large-sized particles, diameters of approximately 255 nm were measured, with a conformal MoS₂ shell thickness of 1.46 nm (corresponding to ~2–3 layers). The medium-sized particles exhibited diameters of 130 nm and a thicker, uniform MoS₂ shell ranging from 1.98 nm (~3–4 layers). The small-sized particles displayed diameters of 255 nm with a MoS₂ shell thickness of 2.41 nm (~4–5 layers). Correspondingly, the thickness distribution of the Al2O3 layer for these three particle sizes is 3.26, 3.73 and 4.02 nm. The clear contrast between the Al core (darker region) and the crystalline MoS₂ shell (lighter fringes) unambiguously confirms the successful formation of the core-shell architecture across the entire particle size range.


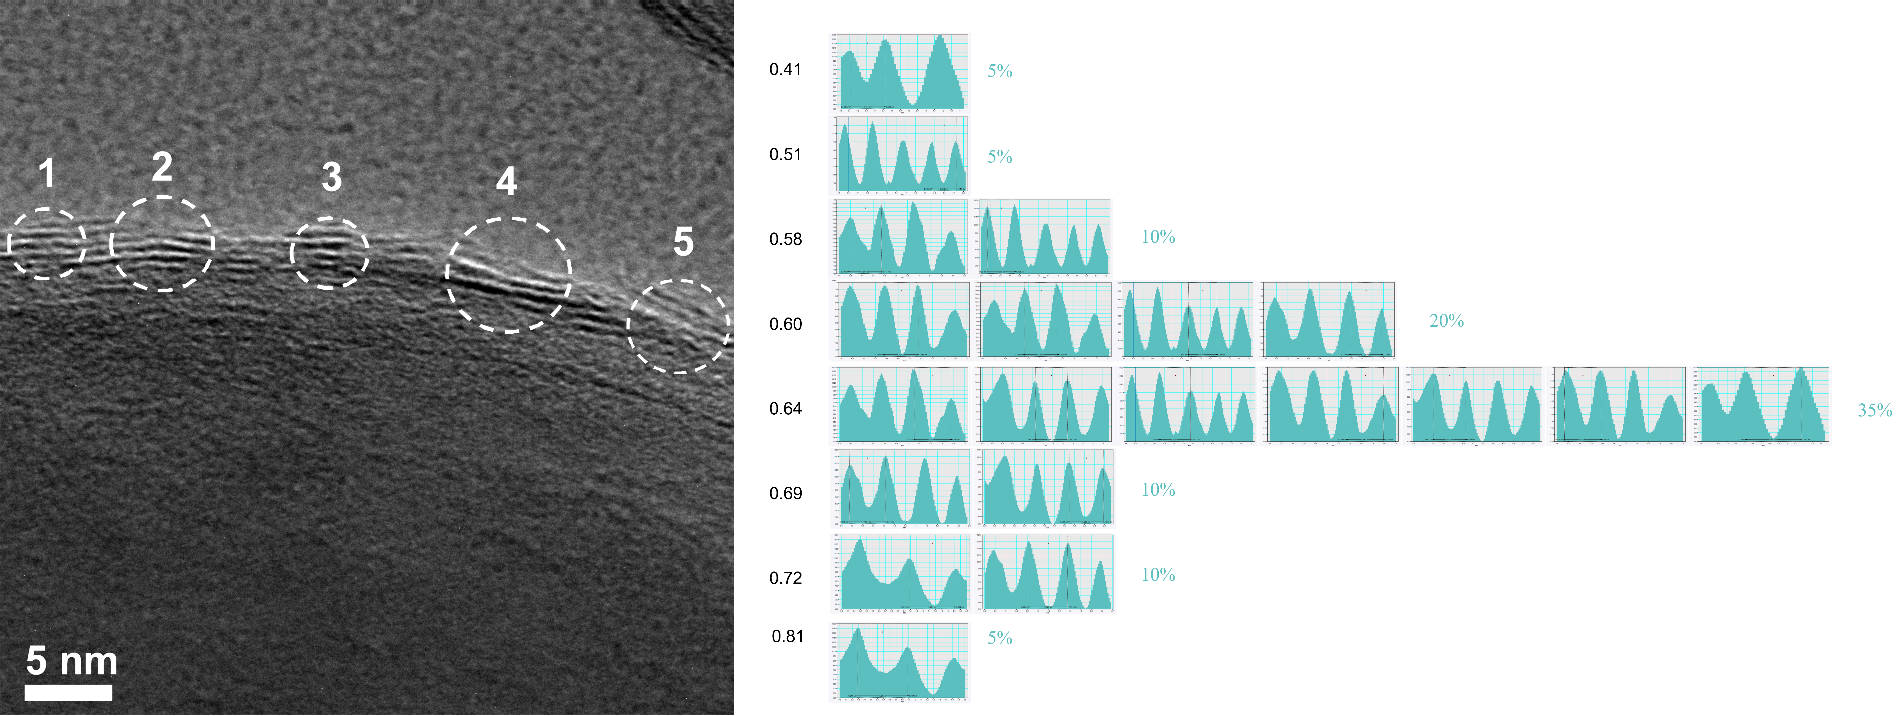


**Fig.S4.** High-resolution TEM analysis of MoS₂ deposited on Al₂O₃ particles (∼255 nm in diameter), showing interplanar spacing values measured at different regions.


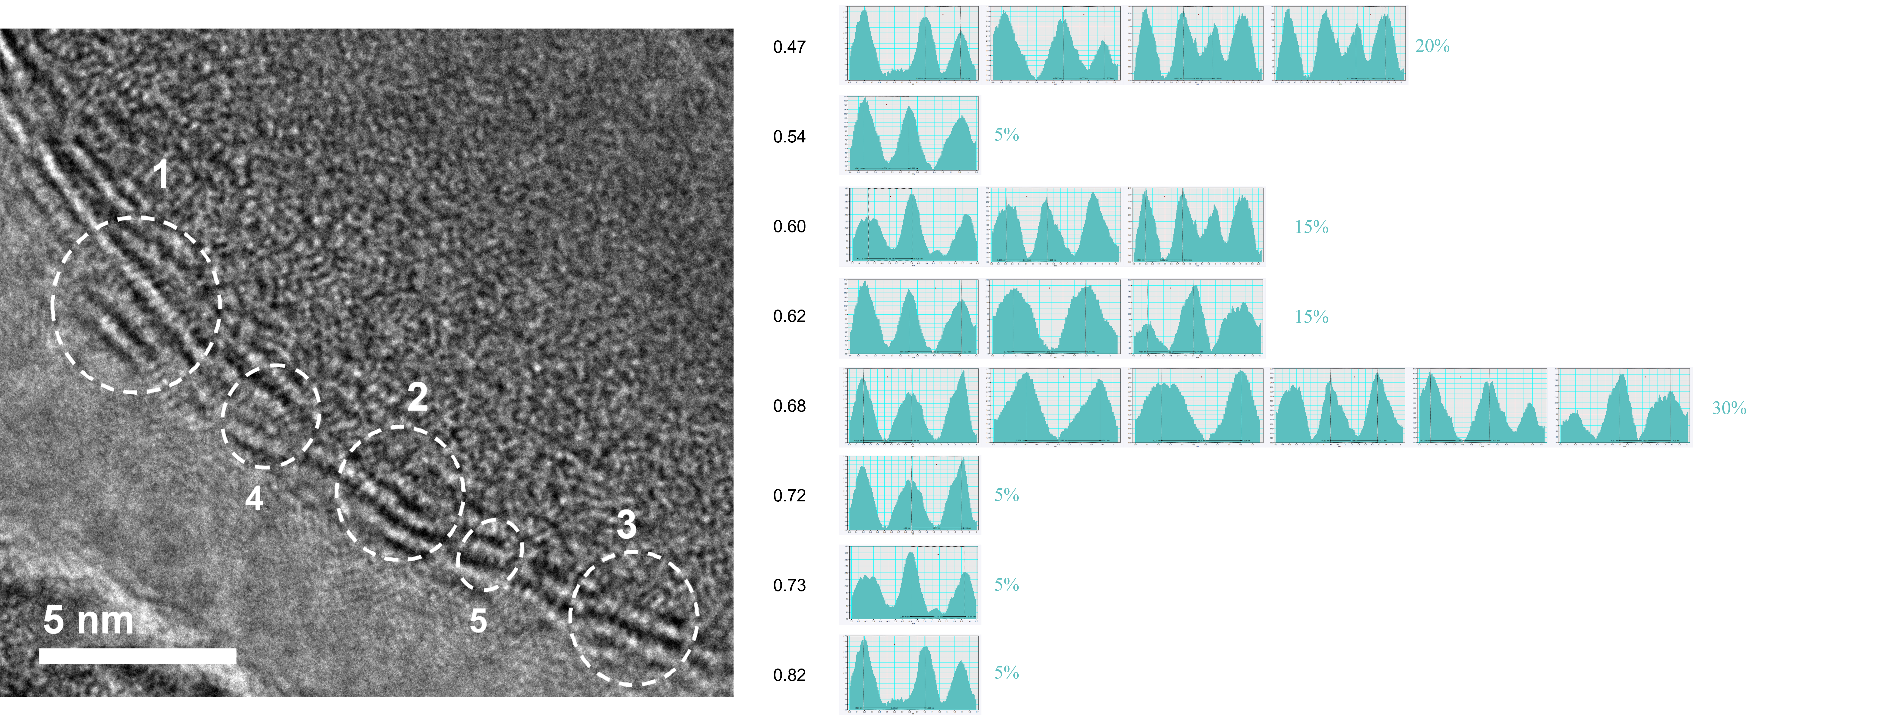


**Fig.S5.** High-resolution TEM analysis of MoS₂ deposited on Al₂O₃ particles (∼130 nm in diameter), showing interplanar spacing values measured at different regions.


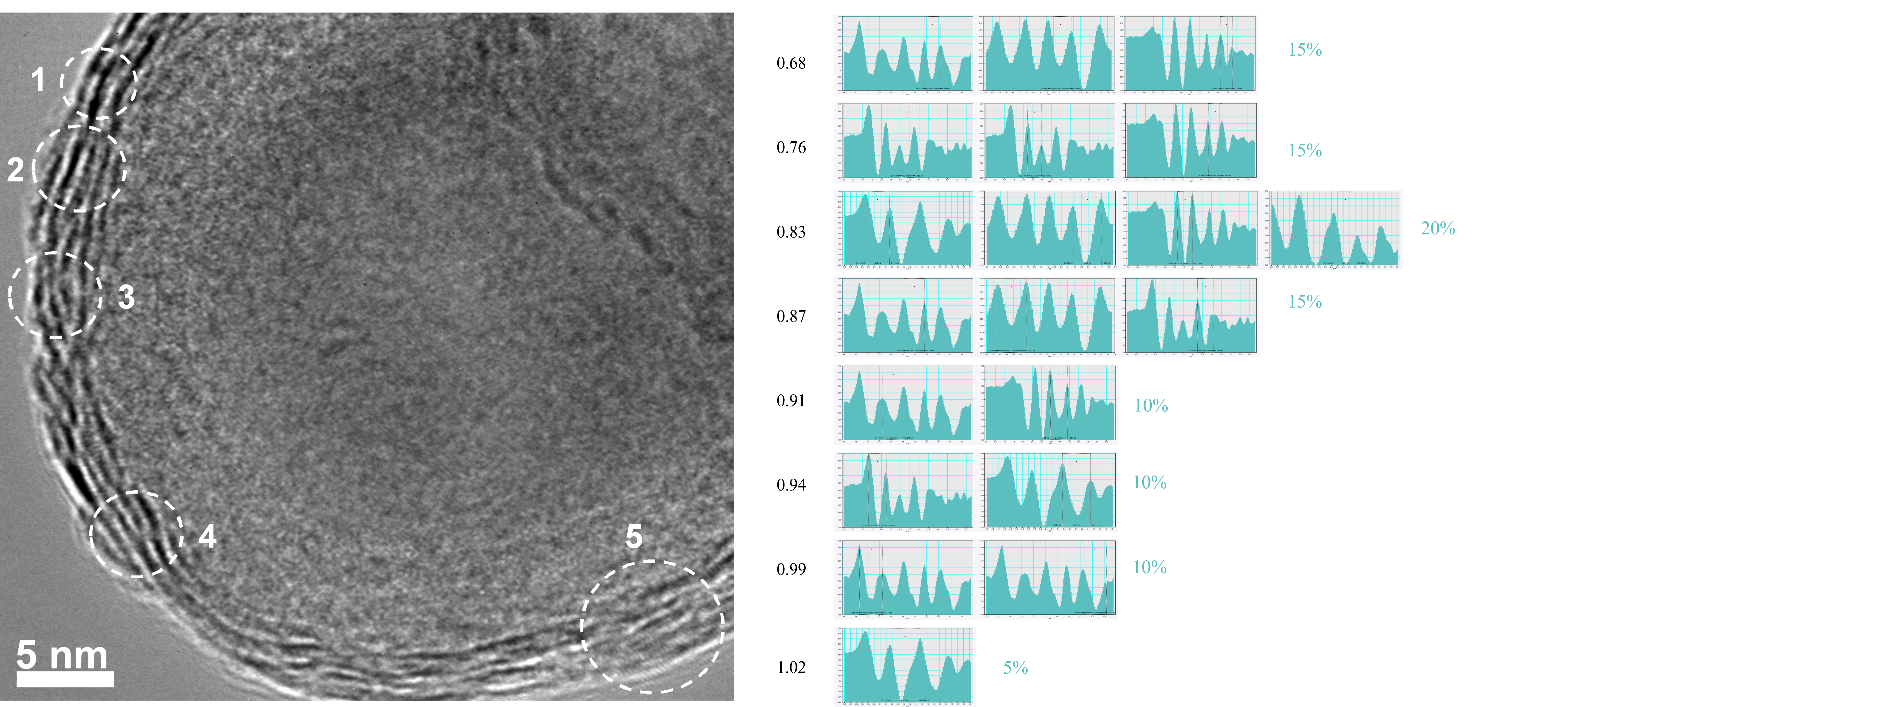


**Fig.S6.** High-resolution TEM analysis of MoS₂ deposited on Al₂O₃ particles (∼25 nm in diameter), showing interplanar spacing values measured at different regions.

Fig.S4-S6 are TEM images with a scale of 5 nm for different particle sizes. It can be observed that as the particle size decreases, the interlayer spacing of the outer MoS2 gradually increases (from 0.64 nm to 0.83 nm), and the defects gradually decrease. This phenomenon originates from a curvature-induced biaxial strain regulation mechanism where the lattice mismatch between the intrinsically planar lattice of MoS₂ and the spherical core induces in-plane biaxial tensile strain in the MoS₂ during the shell material growth process. As the Al nanocore diameter decreases (increasing curvature), the lattice mismatch intensifies, resulting in progressively enhanced biaxial tensile strain within the MoS₂ shell (see Fig. 2i-2k). The positions marked and circled as 1, 2, 3, 4, and 5 in the TEM image are part of the measurement positions for different layer spacings on the right side of the statistics.


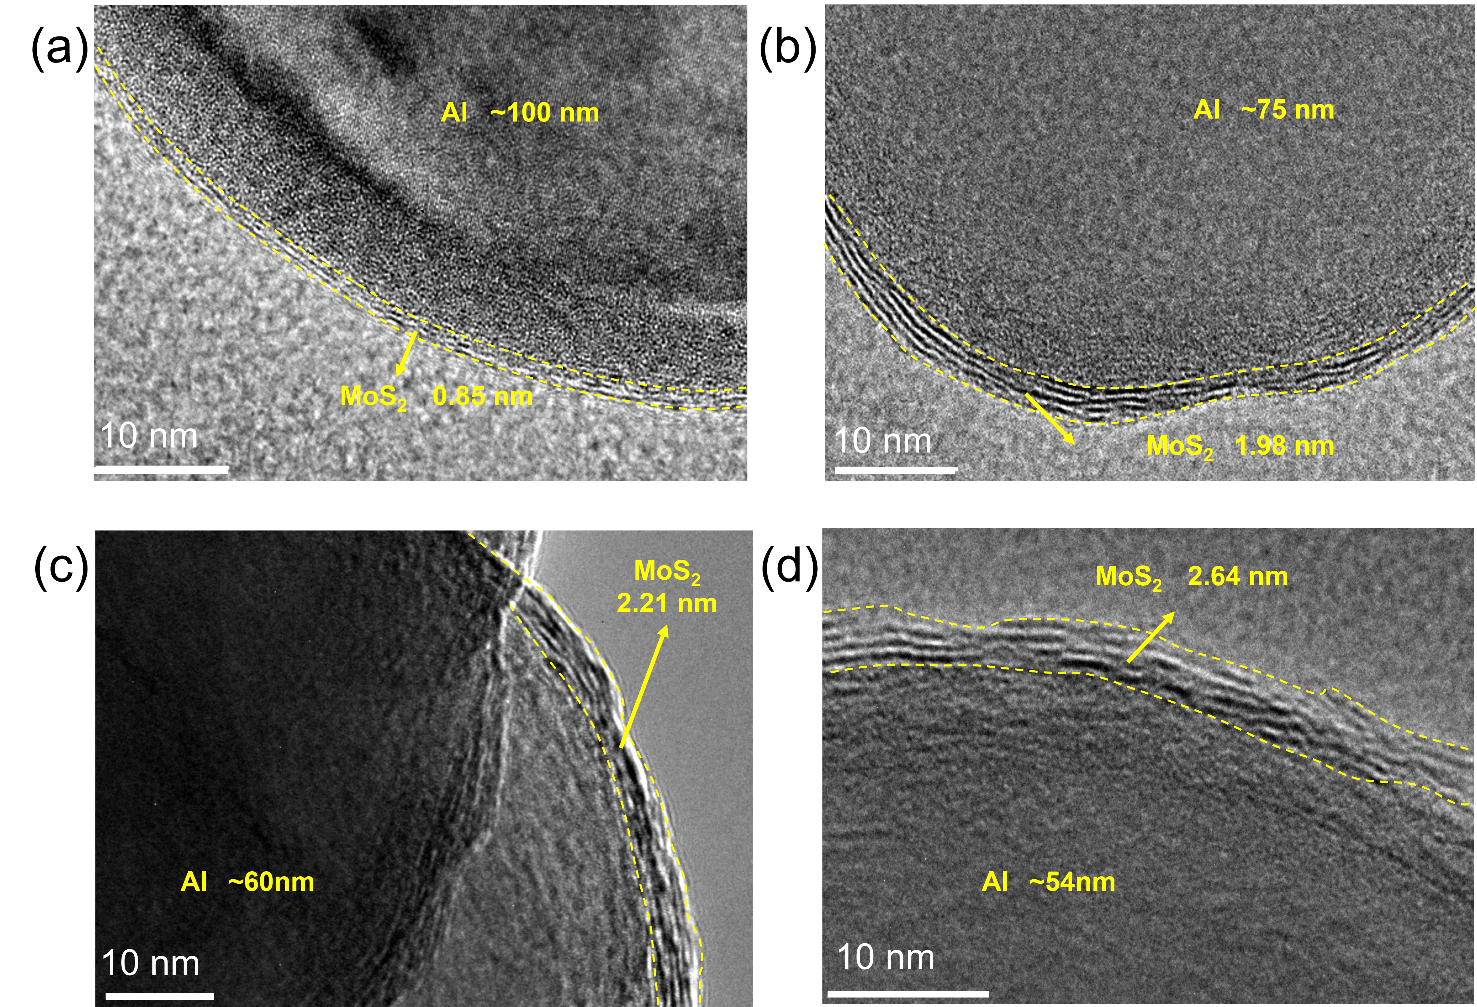


**Fig.S7.** TEM images of monolayer to tetralayer of MoS2

Fig.S7 shows the high-resolution transmission electron microscopy verification results of the tunable growth of MoS₂ shells on the Al/Al₂O₃ cores, corresponding to the statistical layer analysis in Fig. 3a-3d. Panels (a–d) illustrate representative core-shell structures synthesized at precursor concentrations of 5%, 10%, 20%, and 50%, respectively, yielding MoS₂ shells predominantly consisting of 1, 2, 3, and 4 atomic layers. Quantitative analysis reveals: (a) 1-layer MoS₂ (interlayer spacing = 0.85 nm) on a 100 nm Al core; (b) 2-layer MoS₂ (spacing = 1.98 nm) on a 75 nm core; (c) 3-layer MoS₂ (spacing = 2.64 nm) on a 60 nm core; (d) 4-layer MoS₂ (spacing = 2.21 nm) on a 55 nm core. The conformal Al₂O₃ passivation interlayer is clearly resolved at all interfaces. Scale bars: 10 nm for all panels.


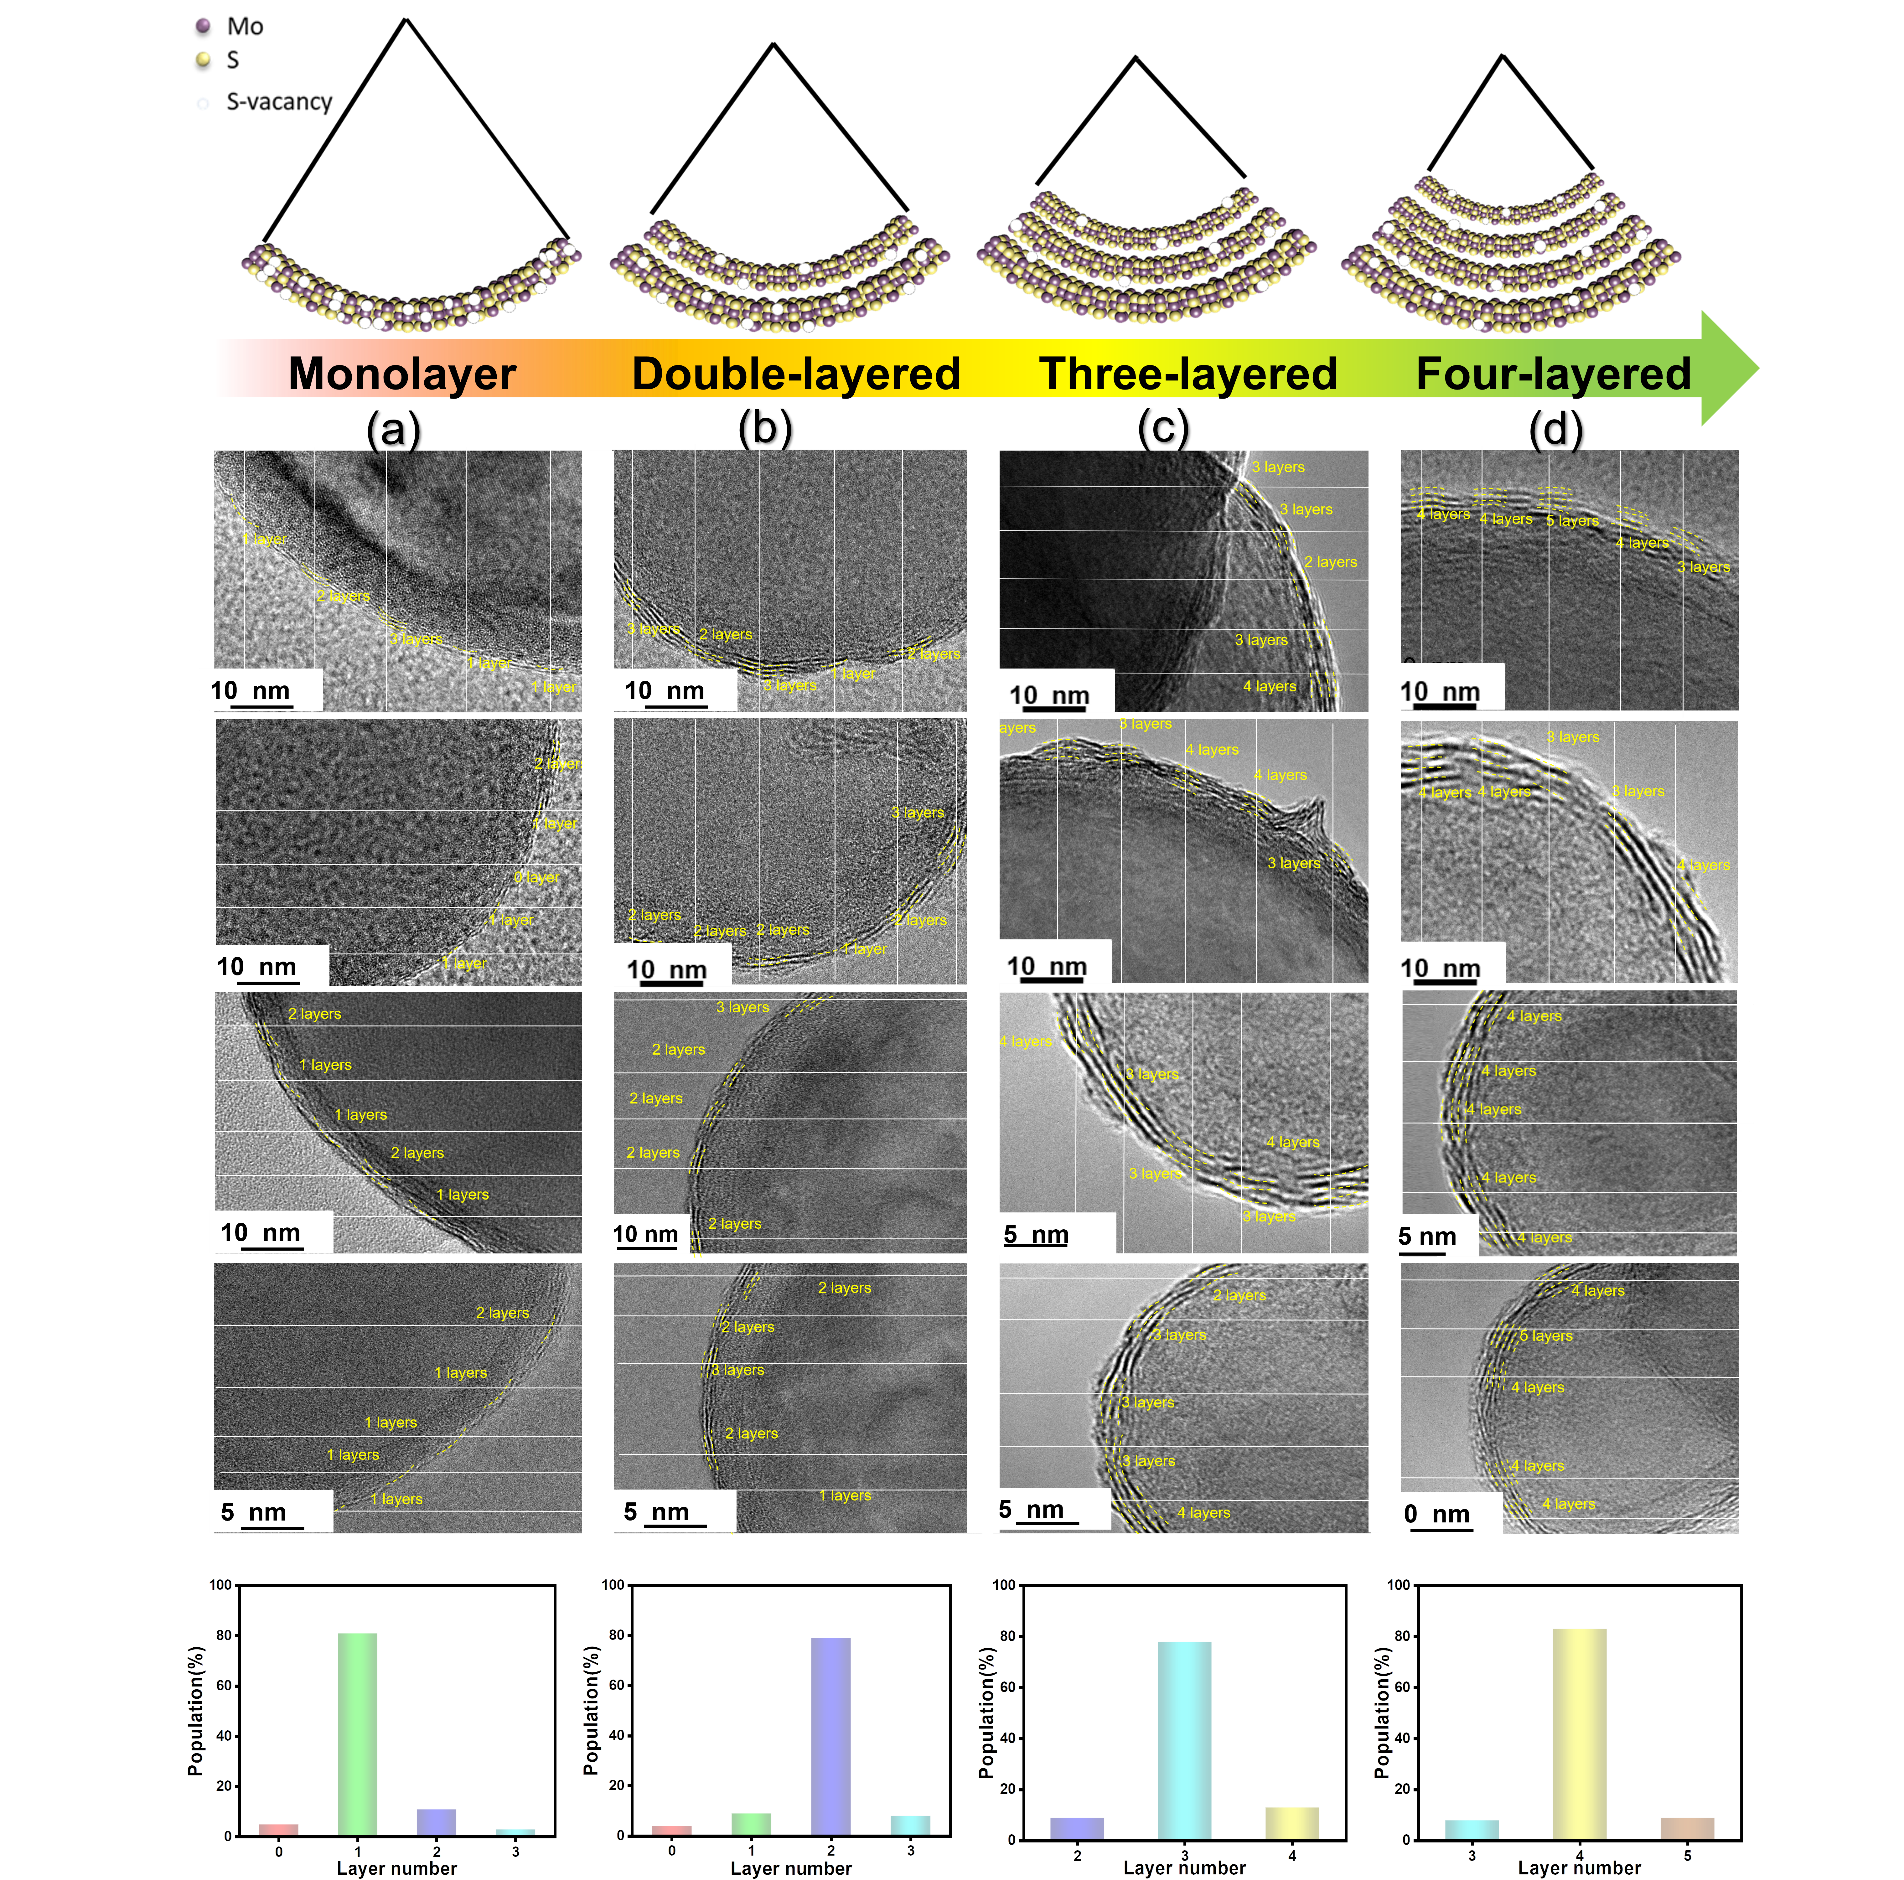


**Fig.S8.** Statistics on the thickness distribution of the MoS2 shell layer.

Fig.S8 presents statistical HRTEM analysis of tunable MoS₂ shell architectures, complementing the layer distribution histograms in Figure 3e–h. The upper panels show representative TEM micrographs of core-shell nanoparticles synthesized at precursor concentrations of 5%, 10%, 20%, and 50%; the lower panels depict the corresponding statistical distributions of MoS₂ layer counts measured at multiple peripheral positions across a minimum of 20 individual nanoparticles per condition. (a) At 5% precursor, Monolayer MoS₂ shells dominate (81%); (b) At 10%, double-layer shells are predominant (79%); (c) At 20%, three-layer shells are most prevalent (78%); (d) At 50%, four-layer shells constitute the majority (83%). This deterministic relationship between precursor concentration and modal layer thickness confirms precise synthetic control over the core-shell geometry.


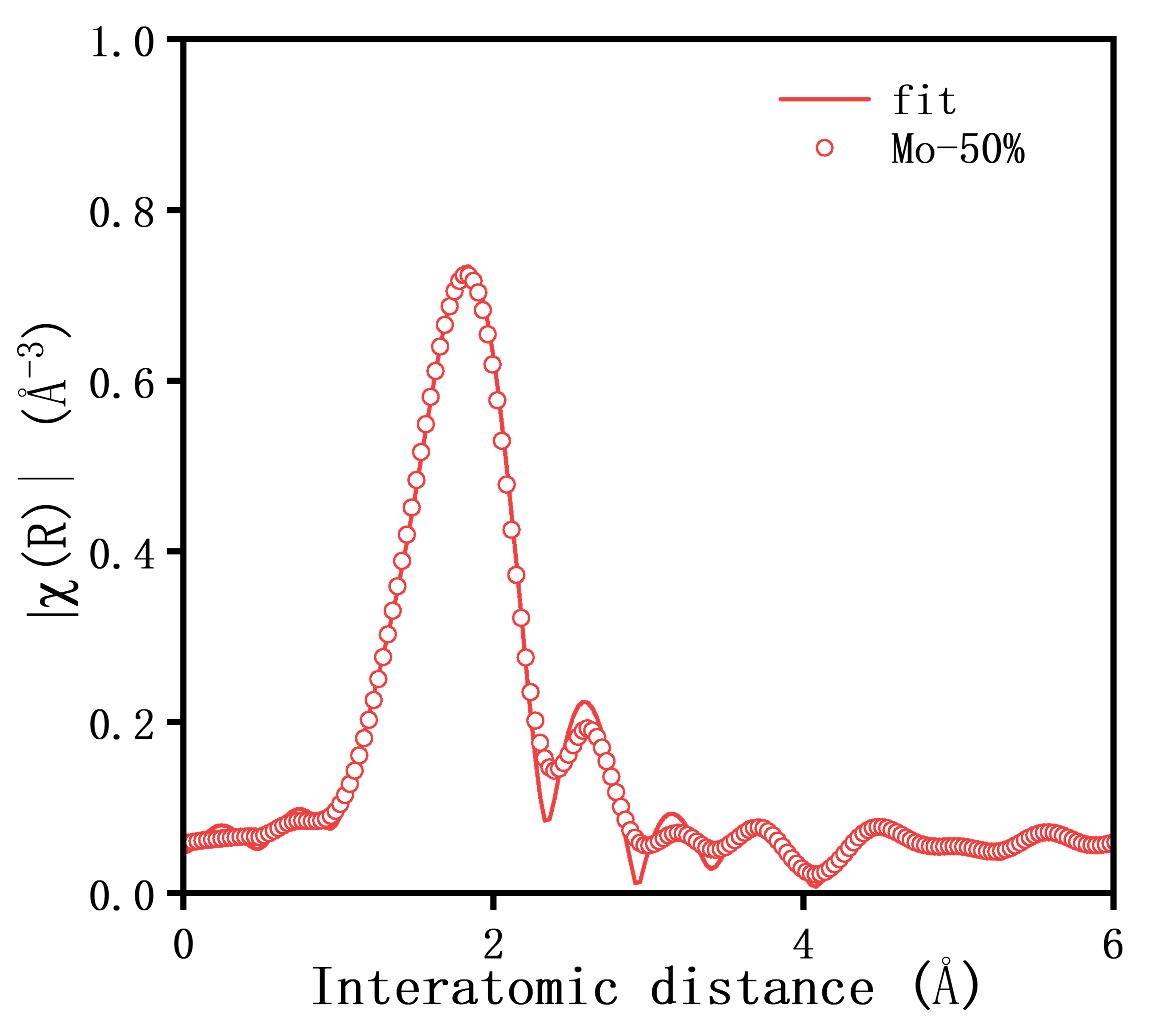


**Fig.S9.** Mo-50% atomic models with R-space EXAFS fitting results.

Fig.S9. Synchrotron X-ray diffraction analysis of the 50% MoS₂-precursor sample. High-resolution powder diffraction (λ = 0.7748 Å) confirms the coexistence of metallic Al (Fm-3m, a = 4.05 Å) and crystalline 2H-MoS₂ (P6₃/mmc, a = 3.16 Å, c = 12.30 Å). The prominent (002) MoS₂ reflection at 2θ = 14.2° (d = 6.15 Å) corroborates the formation of multilayer shells, consistent with the tetralayer-dominated architecture revealed by HRTEM (Fig. 3d). The absence of Al₂O₃ diffraction peaks indicates the amorphous nature of the native passivation layer. This intermediate-concentration sample bridges the structural evolution between the ultrathin shells (5%, Fig. 3n) and fully encapsulated particles (100%, Fig. 3m), validating the precursor-dependent growth mechanism.


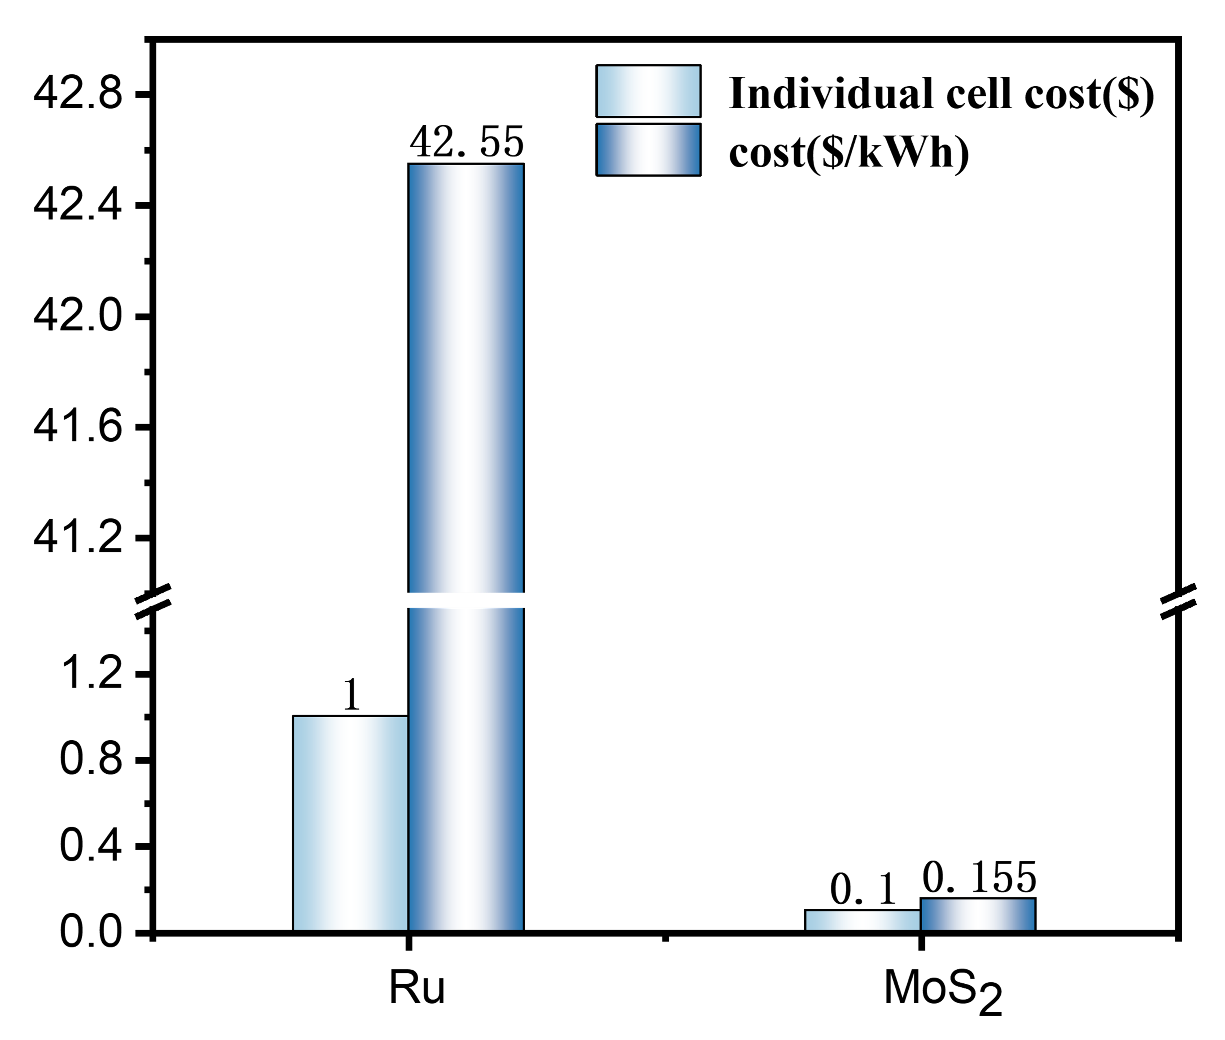


**Fig.S10.** Laboratory-scale single-cell cost comparison and catalyst cost breakdown.

Fig.S10 provides a detailed cost breakdown for lab-assembled single Li–CO₂ cells, revealing that the Ru catalyst is approximately 10 times more expensive than the MoS₂ equivalent on a per-cell basis. When normalized to energy capacity, the catalyst costs are $42.55/kWh for Ru versus $0.155/kWh for MoS2, assuming equal mass loading. In practical Li–CO₂ battery systems, this cost disparity is expected to persist—and potentially widen—due to Ru’s scarcity and price volatility in bulk procurement, whereas MoS₂ benefits from earth-abundance and established large-scale synthesis routes. Moreover, the longer cycle life and higher energy efficiency demonstrated by MoS₂-catalyzed cells (as shown in Fig. 4f) would further reduce the levelized cost of storage over the battery’s operational lifetime, making MoS₂ not only a materially economical choice but also a strategically superior catalyst for scalable energy storage applications.


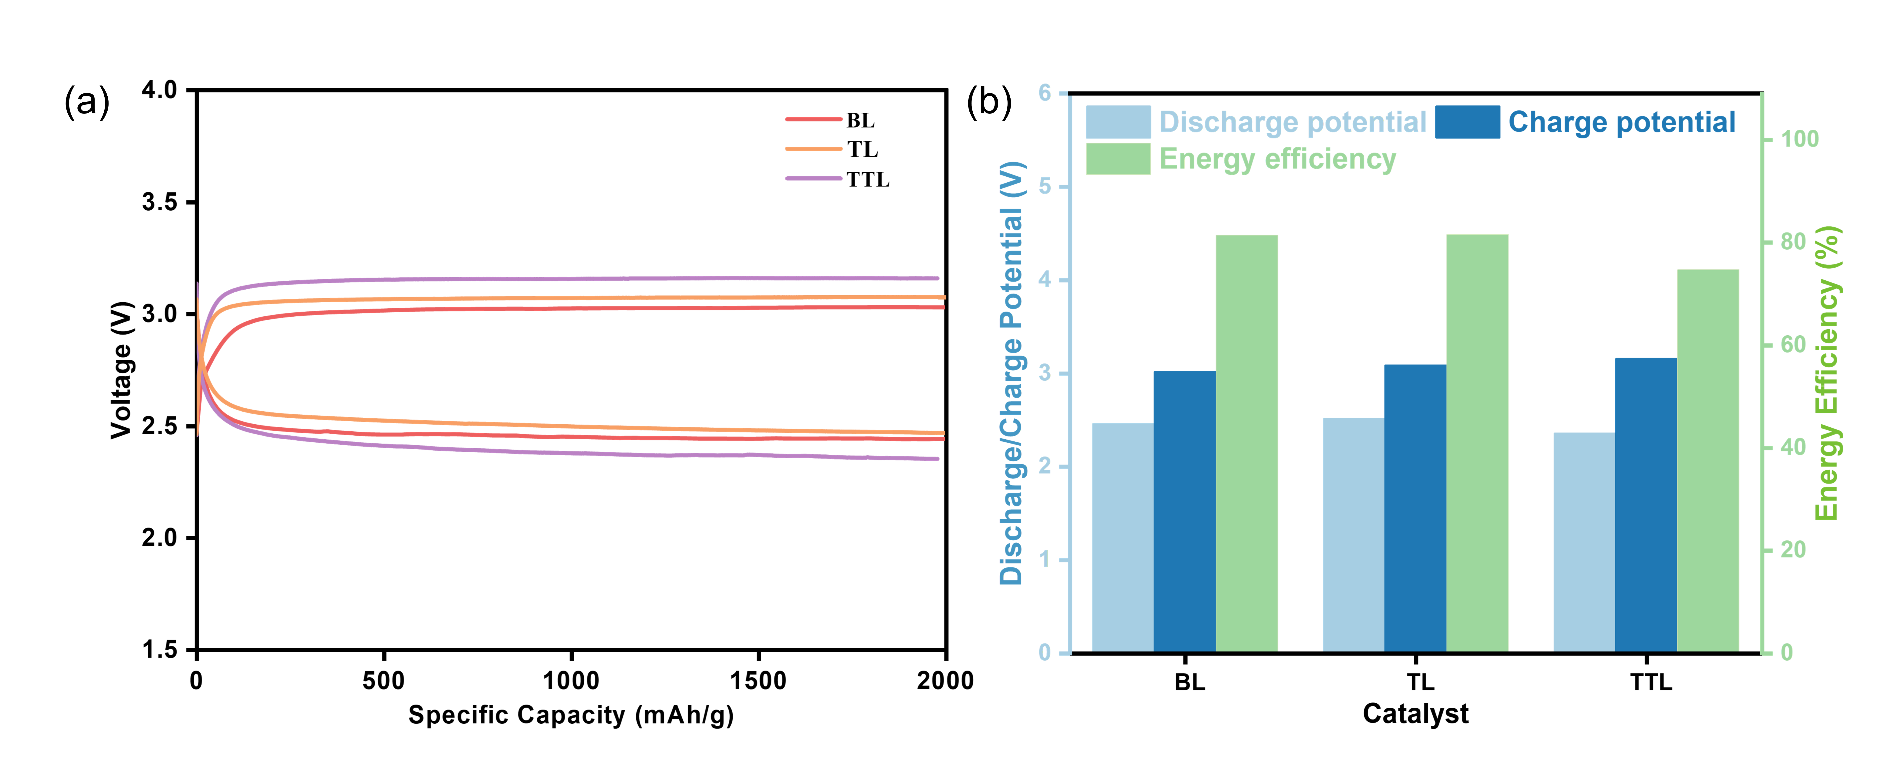


**Fig.S11.** Charge/discharge curve diagrams and energy efficiency graphs for catalysts of different concentrations.

Fig.S11 shows the constant current charge-discharge curves of MoS₂ catalysts synthesized at 10%, 20%, and 50% precursor concentrations, supplementing Figure 4b in the main text. The complete concentration series (5 - 100%) reveals a systematic trend: (i) The charging potentials of the 5% and 10% samples are almost the same, comparable to the ruthenium reference sample; (ii) The 50%, 95%, and 100% samples exhibit convergent, higher charging platforms; (iii) The discharge potentials increase monotonically with the increase in precursor concentration. This confirms that the ultrathin MoS₂ shell (≤ 2 layers) achieves similar performance to noble metals, while thicker shells gradually increase polarization, thereby establishing a clear structure - activity relationship.


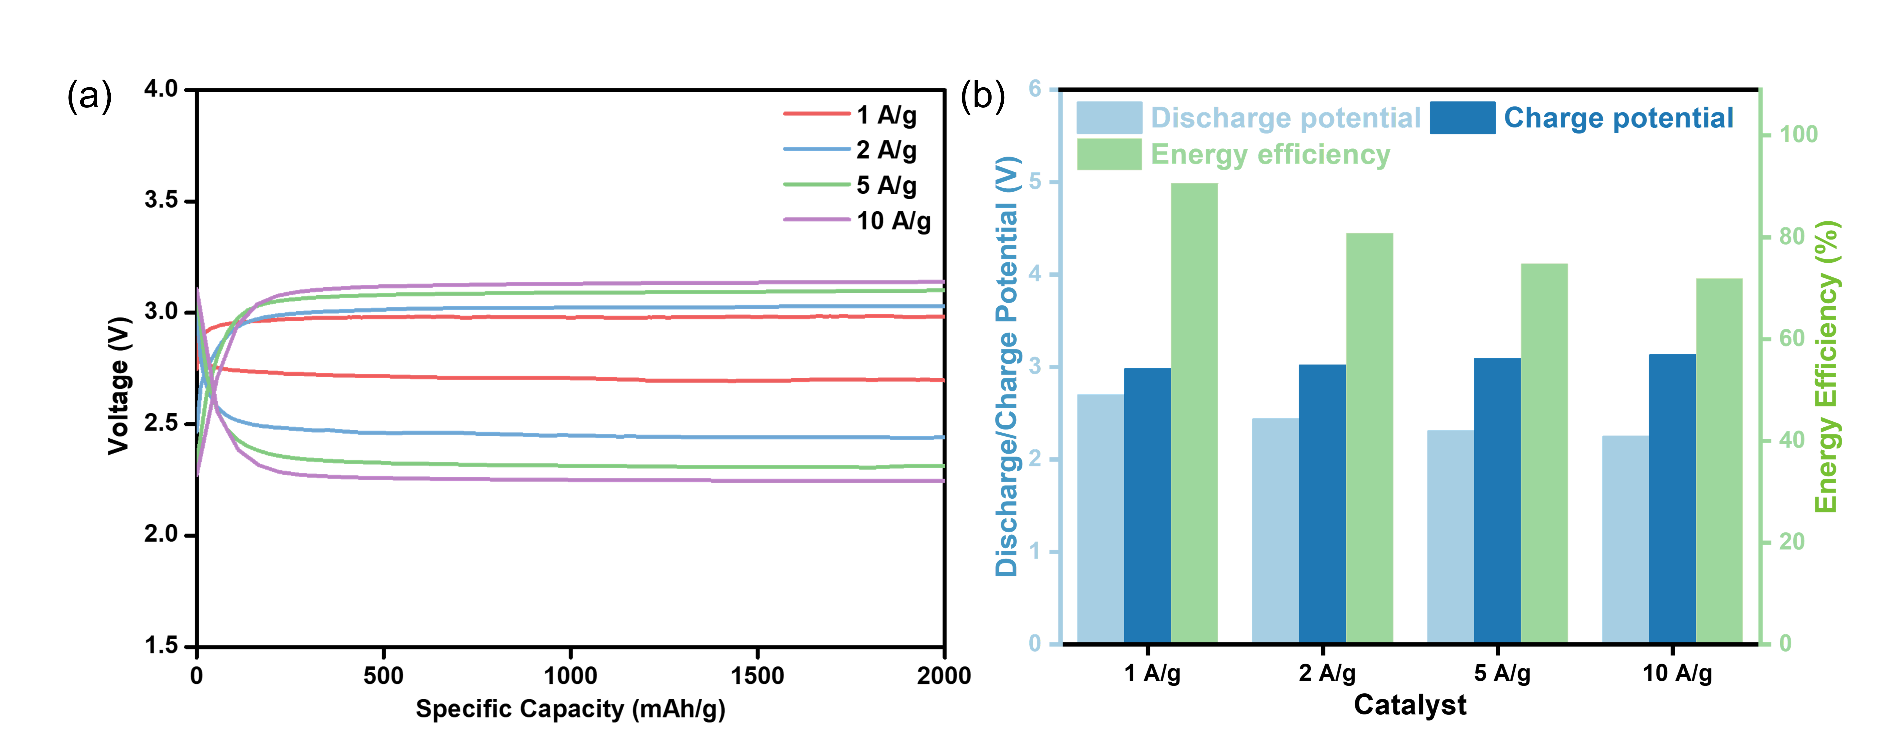


**Fig.S12.** Charge/discharge curve diagrams and energy efficiency graphs under different currents.

Fig.S12. shows rate-dependent electrochemical performance at current densities of 1, 2, 5, and 10 A/g. The charge potential increases monotonically while the discharge potential decreases with current density, resulting in progressively larger overpotentials. These galvanostatic profiles corroborate the rate capability data shown in Fig. 4d. Energy efficiency remains high, decreasing from ~90% at 1 A/g to ~72% at 10 A/g, demonstrating a clear inverse relationship with current density and underscoring the catalyst's robust performance across a wide range of operating conditions.


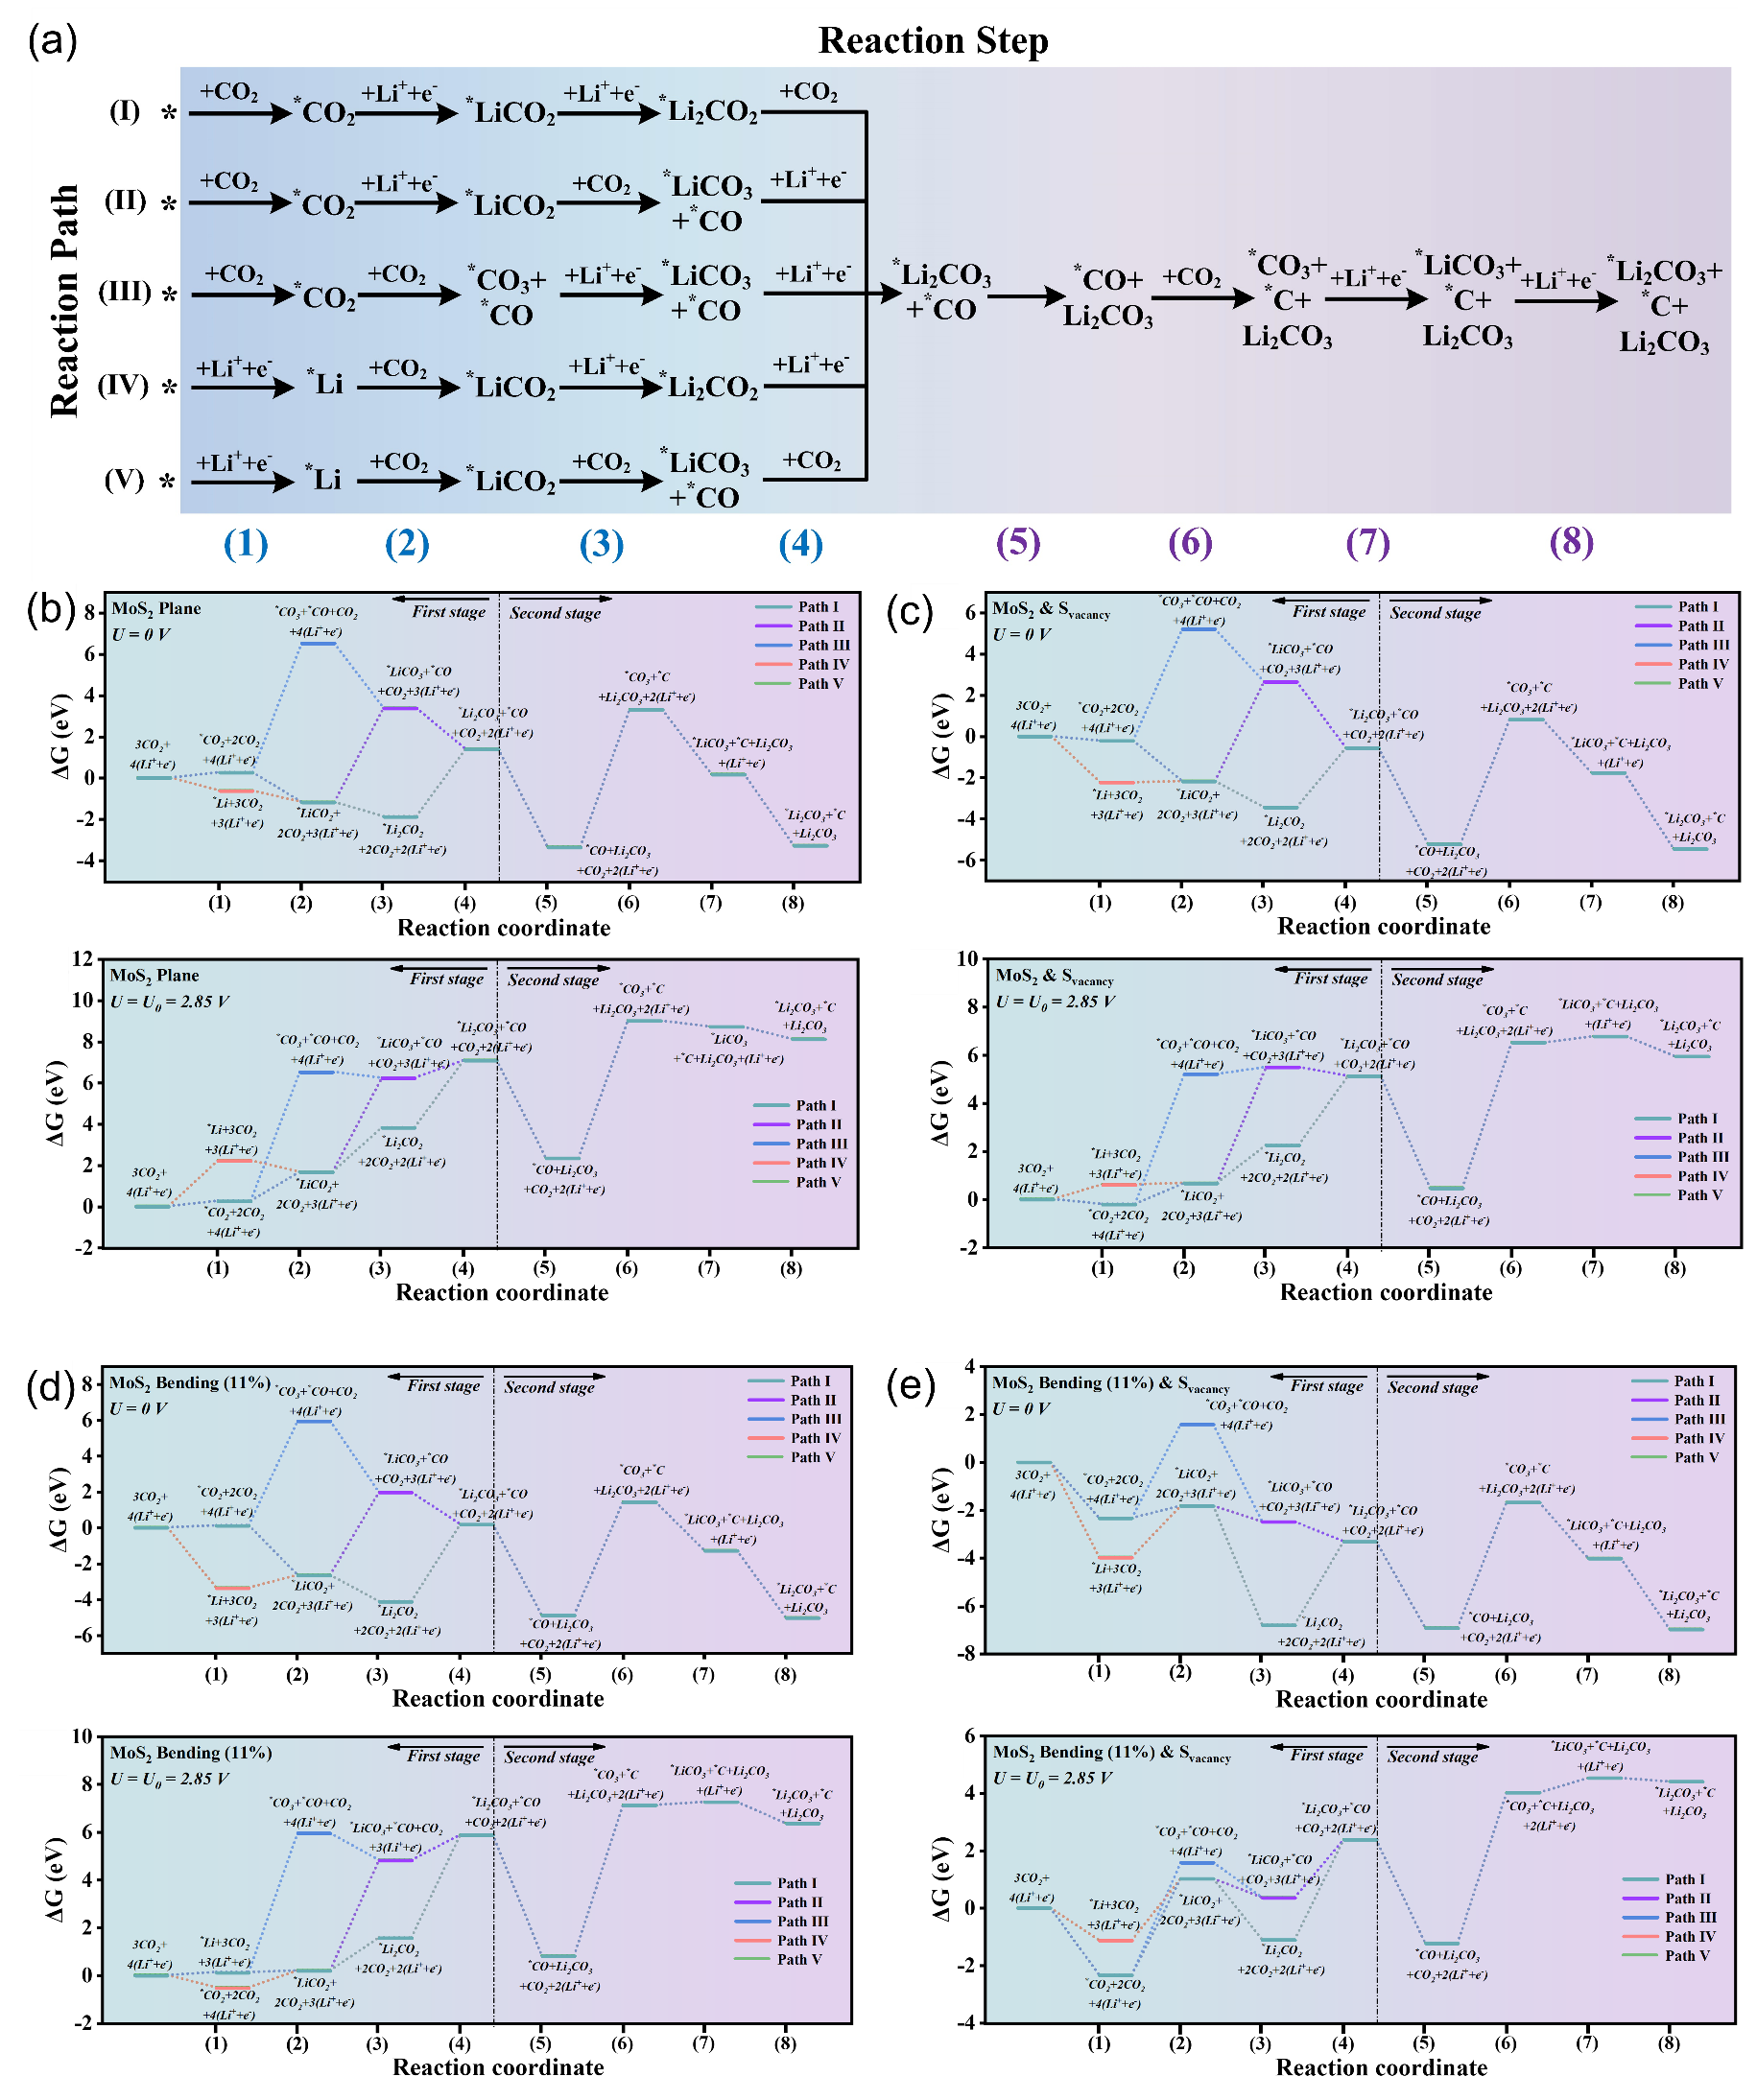


Fig.S13. (a) Five possible reaction pathways and corresponding intermediates for formation of Li2CO3 on MoS2. (b) Gibbs free energy profiles for the catalytic formation of Li₂CO₃ and C on the MoS₂ plane at the open-circuit potential (U = 0 V) and the theoretical equilibrium potential (U = U₀ = 2.85 V). (c) Gibbs free energy profiles for the catalytic formation of Li₂CO₃ and C on the MoS₂ plane with S-vacancy at the open-circuit potential (U = 0 V) and the theoretical equilibrium potential (U = U₀ = 2.85 V). (d) Gibbs free energy profiles for the catalytic formation of Li₂CO₃ and C on the MoS₂ (Bending 11%) at the open-circuit potential (U = 0 V) and the theoretical equilibrium potential (U = U₀ = 2.85 V). (e) Gibbs free energy profiles for the catalytic formation of Li₂CO₃ and C on the MoS₂ (Bending 11%) with S-vacancy at the open-circuit potential (U = 0 V) and the theoretical equilibrium potential (U = U₀ = 2.85 V).

We systematically computed the Gibbs free energy (ΔG) for five possible reaction pathways across four distinct MoS₂ structures (with and without strain/vacancies). As depicted in Fig. S13, the mechanism can be divided into two stages: the first stage (steps 1-4) involves the formation of *Li₂CO₃ and *CO intermediates via the five pathways, while the second stage (steps 5-8) culminates in the final products, Li₂CO₃ and C. The corresponding Gibbs free energy profiles for all four MoS₂ structures along these five pathways were evaluated at both U = 0 V (open-circuit potential) and U = U₀ = 2.85 V (equilibrium potential), as shown in Fig. S13. Tables S2-S5 compile the Gibbs free energy changes for the catalytic reaction processes shown in Fig. S13, respectively. The optimal reaction pathways for the four structures—pristine MoS₂, MoS₂ with an S-vacancy, bent MoS₂ (11%), and bent MoS₂ (11%) with an S-vacancy—are identified as I, IV, I, and V, respectively.

We further calculated the Gibbs free energy change of the rate-determining step (RDS) for each optimal pathway, as summarized in Table S7. The combined data from Fig. 6 and Table S7 demonstrate that the bent MoS₂ structure with an S-vacancy exhibits the lowest energy barriers for the RDS in both the first and second reaction stages, with values of 2.15 eV and 5.25 eV, respectively. This indicates that the bending strain exposes a greater number of Mo atoms at vacancy sites, and the complementary effect between these strain-induced sites and vacancies significantly reduces the energy barrier of the RDS. The mutual reinforcement of bending strain and vacancy formation thus accelerates the reaction kinetics, yielding superior catalytic activity. These computational results robustly validate our experimental observations presented earlier.

**Table S1.** Comparison of representative Li-CO2 battery performances reported in the literature

| Cathode | Electrolyte | Discharge  Potential  (V) | Charge  Potential  (V) | Cycle  (N) | Energy efficiency  % | Ref. |
| --- | --- | --- | --- | --- | --- | --- |
| Cu(I)RM,Ru | organic | 3.01 | 3.99 | 400 | 75.4 | [1] |
| RuAC+SA@NCB | organic | 2.68 | 4.25 | 60 | 63 | [2] |
| 2D RuCo-NSs | organic | 2.8 | 3.74 | 95 | 74.9 | [3] |
| CNT/Ru | organic | 2.5 | 4 | 200 | 62.5 | [4] |
| CNT@RuO2 | organic | 2.46 | 3.97 | 55 | 62 | [5] |
| RuO2-TiO2 NAs/CT | organic | 2.6 | 3.65 | 238 | 71.2 | [6] |
| RuO2/LDO | organic | 2.5 | 4.22 | 60 | 59.2 | [7] |
| MnOx-CeO2@PPy | organic | 2.51 | 4 | 253 | 62.75 | [8] |
| COF-Ru@CNT | organic | 2.73 | 4.27 | 200 | 64 | [9] |
| NiFe@NC/PPC | organic | 2.64 | 4.2 | 109 | 62.9 | [10] |
| Cu-NG | organic | 2.74 | 4 | 50 | 68.5 | [11] |
| Ir | organic | 2.5 | 4.1 | 150 | 61 | [12] |
| B-NCNT | organic | 2.5 | 4.4 | 360 | 56.8 | [13] |
| RuO2@CNT | organic | 2.6 | 3.7 | 55 | 70.3 | [14] |
| Fe-ISA/N | organic | 2.7 | 4.25 | 210 | 63.5 | [15] |
| RuP2-NPCFs | organic | 2.9 | 4 | 200 | 72.5 | [16] |
| Ru-Cu-G | organic | 2.6 | 3.7 | 100 | 70.3 | [17] |
| GPE/CNTs | solid | 2.5 | 4.5 | 60 | 51.1 | [18] |
| N,S-doped CNTs | solid | 2.3 | 4.5 | 538 | 55.6 | [19] |
| RuO2/CNT | solid | 2.6 | 3.8 | 31 | 68.4 | [20] |
| RuO2/SWCNTs | solid | 2.8 | 4.1 | 30 | 68.3 | [21] |
| Ru | solid | 2.9 | 3.9 | 50 | 74.4 | [22] |
| RuO2 | solid | 2.6 | 3.7 | 20 | 70.3 | [23] |
| Ir | solid | 2.0 | 4.3 | 150 | 46.5 | [24] |
| Ru | solid | 2.32 | 3.0 | 150 | 77.3 | [25] |
| Ru | solid | 2.2 | 3.12 | 450 | 70.5 | [26] |
| LLZTO | solid | 2.5 | 4 | 70 | 62.5 | [27] |
| MWCNTs | solid | 2.5 | 4.5 | 60 | 55.6 | [28] |
| Ru-CNTs | solid | 2.76 | 4.24 | 45 | 65.1 | [29] |
| MoS2 | organic /MoS2 | 3.1 | 4.2 | 500 | 73.8 | [30] |
| MoS2-Ns | organic /MoS2 | 2.75 | 3.75 | 50 | 73.3 | [31] |
| NiFe2O4/MoS2/ MWCNTs | organic /MoS2 | 2.68 | 4.3 | 195 | 78.8 | [32] |
| V-MoS2/Co9S8@CP | organic /MoS2 | 2.8 | 3.98 | 63 | 81.2 | [33] |
| MoS2/CNT | organic /MoS2 | 2.6 | 4.0 | 80 | 65 | [34] |
| Ru | organic /MoS2 | 2.5 | 4.4 | 112 | 56.8 | [35] |
| Ru | molten salt | 2.4 | 3.05 | 980 | 78.69 | [36] |
| Ru | molten salt | 2.6 | 4.2 | 140 | 61.9 | [37] |
| Ru@Super P | molten salt | 2 | 3.2 | 70 | 62.5 | [38] |
| Ru@QNFs | molten salt | 2.33 | 3.03 | 457 | 76.9 | [39] |
| Co@N-hCNT | molten salt | 2.7 | 4.3 | 220 | 62.8 | [40] |
| MoS2@Al | molten salt | 2.2 | 2.95 | 3940 | 75 | This work | |

**Table S2.** The Gibbs free energy change (ΔG) of each reaction step on the plane of MoS2 corresponding to the Figure 4.

| **Reaction step (MoS₂ plane)** | **I** | **II** | **III** | **IV** | **V** |
| --- | --- | --- | --- | --- | --- |
| **(1) (U=0 V), ΔG (eV)** | 0.26 | 0.26 | 0.26 | -0.63 | -0.63 |
| **(2) (U=0 V), ΔG (eV)** | -1.44 | -1.44 | 6.26 | -0.55 | -0.55 |
| **(3) (U=0 V), ΔG (eV)** | -0.70 | 4.56 | -3.14 | -0.70 | 4.56 |
| **(4) (U=0 V), ΔG (eV)** | 3.27 | -1.99 | -1.99 | 3.27 | -1.99 |
| **(5) (U=0 V), ΔG (eV)** | -4.75 | -4.75 | -4.75 | -4.75 | -4.75 |
| **(6) (U=0 V), ΔG (eV)** | 6.67 | 6.67 | 6.67 | 6.67 | 6.67 |
| **(7) (U=0 V), ΔG (eV)** | -3.14 | -3.14 | -3.14 | -3.14 | -3.14 |
| **(8) (U=0 V), ΔG (eV)** | -3.45 | -3.45 | -3.45 | -3.45 | -3.45 |
| **(1) (U=U0=2.85 V), ΔG (eV)** | 0.26 | 0.26 | 0.26 | 2.22 | 2.22 |
| **(2) (U=U0=2.85 V), ΔG (eV)** | 1.41 | 1.41 | 6.26 | -0.55 | -0.55 |
| **(3) (U=U0=2.85 V), ΔG (eV)** | 2.15 | 4.56 | -0.29 | 2.15 | 4.56 |
| **(4) (U=U0=2.85 V), ΔG (eV)** | 3.27 | 0.86 | 0.86 | 3.27 | 0.86 |
| **(5) (U=U0=2.85 V), ΔG (eV)** | -4.75 | -4.75 | -4.75 | -4.75 | -4.75 |
| **(6) (U=U0=2.85 V), ΔG (eV)** | 6.67 | 6.67 | 6.67 | 6.67 | 6.67 |
| **(7) (U=U0=2.85 V), ΔG (eV)** | -0.29 | -0.29 | -0.29 | -0.29 | -0.29 |
| **(8) (U=U0=2.85 V), ΔG (eV)** | -0.60 | -0.60 | -0.60 | -0.60 | -0.60 |

**Table S3.** The Gibbs free energy change (ΔG) of each reaction step on the plane of MoS2 with S-vacancy corresponding to the Figure 5.

| **Reaction step (MoS₂ plane &Svacanacy)** | **I** | **II** | **III** | **IV** | **V** |
| --- | --- | --- | --- | --- | --- |
| **(1) (U=0 V), ΔG (eV)** | -0.21 | -0.21 | -0.21 | -2.24 | -2.24 |
| **(2) (U=0 V), ΔG (eV)** | -1.97 | -1.97 | 5.42 | 0.06 | 0.06 |
| **(3) (U=0 V), ΔG (eV)** | -1.27 | 4.83 | -2.56 | -1.27 | 4.83 |
| **(4) (U=0 V), ΔG (eV)** | 2.88 | -3.22 | -3.22 | 2.88 | -3.22 |
| **(5) (U=0 V), ΔG (eV)** | -4.66 | -4.66 | -4.66 | -4.66 | -4.66 |
| **(6) (U=0 V), ΔG (eV)** | 6.05 | 6.05 | 6.05 | 6.05 | 6.05 |
| **(7) (U=0 V), ΔG (eV)** | -2.59 | -2.59 | -2.59 | -2.59 | -2.59 |
| **(8) (U=0 V), ΔG (eV)** | -3.69 | -3.69 | -3.69 | -3.69 | -3.69 |
| **(1) (U=U0=2.85 V), ΔG (eV)** | -0.21 | -0.21 | -0.21 | 0.61 | 0.61 |
| **(2) (U=U0=2.85 V), ΔG (eV)** | 0.88 | 0.88 | 5.42 | 0.06 | 0.06 |
| **(3) (U=U0=2.85 V), ΔG (eV)** | 1.58 | 4.83 | 0.29 | 1.58 | 4.83 |
| **(4) (U=U0=2.85 V), ΔG (eV)** | 2.88 | -0.37 | -0.37 | 2.88 | -0.37 |
| **(5) (U=U0=2.85 V), ΔG (eV)** | -4.66 | -4.66 | -4.66 | -4.66 | -4.66 |
| **(6) (U=U0=2.85 V), ΔG (eV)** | 6.05 | 6.05 | 6.05 | 6.05 | 6.05 |
| **(7) (U=U0=2.85 V), ΔG (eV)** | 0.26 | 0.26 | 0.26 | 0.26 | 0.26 |
| **(8) (U=U0=2.85 V), ΔG (eV)** | -0.84 | -0.84 | -0.84 | -0.84 | -0.84 |

**Table S4.** The Gibbs free energy change (ΔG) of each reaction step on the MoS₂ (Bending 11%) corresponding to the Figure 6.

| **Reaction step (MoS₂ (Bending 11%))** | **I** | **II** | **III** | **IV** | **V** |
| --- | --- | --- | --- | --- | --- |
| **(1) (U=0 V), ΔG (eV)** | 0.12 | 0.12 | 0.12 | -3.37 | -3.37 |
| **(2) (U=0 V), ΔG (eV)** | -2.78 | -2.78 | 5.83 | 0.71 | 0.71 |
| **(3) (U=0 V), ΔG (eV)** | -1.47 | 4.63 | -3.98 | -1.47 | 4.63 |
| **(4) (U=0 V), ΔG (eV)** | 4.31 | -1.79 | -1.79 | 4.31 | -1.79 |
| **(5) (U=0 V), ΔG (eV)** | -5.07 | -5.07 | -5.07 | -5.07 | -5.07 |
| **(6) (U=0 V), ΔG (eV)** | 6.32 | 6.32 | 6.32 | 6.32 | 6.32 |
| **(7) (U=0 V), ΔG (eV)** | -2.72 | -2.72 | -2.72 | -2.72 | -2.72 |
| **(8) (U=0 V), ΔG (eV)** | -3.75 | -3.75 | -3.75 | -3.75 | -3.75 |
| **(1) (U=U0=2.85 V), ΔG (eV)** | 0.12 | 0.12 | 0.12 | -0.52 | -0.52 |
| **(2) (U=U0=2.85 V), ΔG (eV)** | 0.07 | 0.07 | 5.83 | 0.71 | 0.71 |
| **(3) (U=U0=2.85 V), ΔG (eV)** | 1.38 | 4.63 | -1.13 | 1.38 | 4.63 |
| **(4) (U=U0=2.85 V), ΔG (eV)** | 4.31 | 1.06 | 1.06 | 4.31 | 1.06 |
| **(5) (U=U0=2.85 V), ΔG (eV)** | -5.07 | -5.07 | -5.07 | -5.07 | -5.07 |
| **(6) (U=U0=2.85 V), ΔG (eV)** | 6.32 | 6.32 | 6.32 | 6.32 | 6.32 |
| **(7) (U=U0=2.85 V), ΔG (eV)** | 0.13 | 0.13 | 0.13 | 0.13 | 0.13 |
| **(8) (U=U0=2.85 V), ΔG (eV)** | -0.90 | -0.90 | -0.90 | -0.90 | -0.90 |

**Table S5.** The Gibbs free energy change (ΔG) of each reaction step on the MoS₂ (Bending 11%) with S-vacancy corresponding to the Figure 7.

| **Reaction step (MoS₂ (Bending 11%) &Svacanacy)** | **I** | **II** | **III** | **IV** | **V** |
| --- | --- | --- | --- | --- | --- |
| **(1) (U=0 V), ΔG (eV)** | -2.34 | -2.34 | -2.34 | -3.98 | -3.98 |
| **(2) (U=0 V), ΔG (eV)** | 0.51 | 0.51 | 3.92 | 2.15 | 2.15 |
| **(3) (U=0 V), ΔG (eV)** | -4.98 | -0.66 | -4.07 | -4.98 | -0.66 |
| **(4) (U=0 V), ΔG (eV)** | 3.49 | -0.83 | -0.83 | 3.49 | -0.83 |
| **(5) (U=0 V), ΔG (eV)** | -3.61 | -3.61 | -3.61 | -3.61 | -3.61 |
| **(6) (U=0 V), ΔG (eV)** | 5.25 | 5.25 | 5.25 | 5.25 | 5.25 |
| **(7) (U=0 V), ΔG (eV)** | -2.34 | -2.34 | -2.34 | -2.34 | -2.34 |
| **(8) (U=0 V), ΔG (eV)** | -2.97 | -2.97 | -2.97 | -2.97 | -2.97 |
| **(1) (U=U0=2.85 V), ΔG (eV)** | -2.34 | -2.34 | -2.34 | -1.13 | -1.13 |
| **(2) (U=U0=2.85 V), ΔG (eV)** | 3.36 | 3.36 | 3.92 | 2.15 | 2.15 |
| **(3) (U=U0=2.85 V), ΔG (eV)** | -2.13 | -0.66 | -1.22 | -2.13 | -0.66 |
| **(4) (U=U0=2.85 V), ΔG (eV)** | 3.49 | 2.02 | 2.02 | 3.49 | 2.02 |
| **(5) (U=U0=2.85 V), ΔG (eV)** | -3.61 | -3.61 | -3.61 | -3.61 | -3.61 |
| **(6) (U=U0=2.85 V), ΔG (eV)** | 5.25 | 5.25 | 5.25 | 5.25 | 5.25 |
| **(7) (U=U0=2.85 V), ΔG (eV)** | 0.51 | 0.51 | 0.51 | 0.51 | 0.51 |
| **(8) (U=U0=2.85 V), ΔG (eV)** | -0.12 | -0.12 | -0.12 | -0.12 | -0.12 |

**Table S6.** The D-band center for Mo atoms and bond length (Mo-S) in a monolayer MoS₂ under varying stress.

| **Strain**  **MOS2** | **-5%** | **-4%** | **-3%** | **-2%** | **-1%** | **0%** | **1%** | **2%** | **3%** | **4%** | **5%** |
| --- | --- | --- | --- | --- | --- | --- | --- | --- | --- | --- | --- |
| **Bond length** | 2.292 | 2.315 | 2.339 | 2.364 | 2.383 | 2.413 | 2.443 | 2.473 | 2.492 | 2.516 | 2.539 |
| **D-band center** | -1.31 | -1.28 | -1.05 | -1.01 | -0.97 | -0.93 | -0.92 | -0.91 | -0.90 | -0.88 | -0.86 |

**Table S7.** The free energy changes of the rate-determining steps at equilibrium potential (ΔG) for the best possible path on the MoS2 plane, MoS₂ plane with S-vacancy, MoS₂(bend 11%) , MoS₂(bend 11%) with S-vacancy.

| **Reaction path** |  | **I** | **II** | **III** | **IV** | **V** |
| --- | --- | --- | --- | --- | --- | --- |
| **MoS2 plane** | Rate-determining Step 1 | (4) |  |  |  |  |
| ΔG (eV) | 3.27 |  |  |  |  |
| Rate-determining Step2 | (6) |  |  |  |  |
| ΔG (eV) | 6.67 |  |  |  |  |
| **MoS₂ plane with S-vacancy** | Rate-determining Step 1 |  |  |  | (4) |  |
| ΔG (eV) |  |  |  | 2.88 |  |
| Rate-determining Step2 |  |  |  | (6) |  |
| ΔG (eV) |  |  |  | 6.32 |  |
| **MoS₂(bend 11%)** | Rate-determining Step 1 | (4) |  |  |  |  |
| ΔG (eV) | 4.31 |  |  |  |  |
| Rate-determining Step2 | (6) |  |  |  |  |
| ΔG (eV) | 6.05 |  |  |  |  |
| **MoS₂(bend 11%) with S-vacancy** | Rate-determining Step 1 |  |  |  |  | (2) |
| ΔG (eV) |  |  |  |  | 2.15 |
| Rate-determining Step2 |  |  |  |  | (6) |
| ΔG (eV) |  |  |  |  | 5.25 |

**References**

1. Sun, X., Mu, X., Zheng, W. *et al.* Binuclear Cu complex catalysis enabling Li–CO2 battery with a high discharge voltage above 3.0 V. *Nat. Commun.* **14**, 536 (2023).
2. Lin, J., Ding, J., Wang, H. *et al.* Boosting Energy Efficiency and Stability of Li–CO2 Batteries via Synergy between Ru Atom Clusters and Single-Atom Ru–N4 sites in the Electrocatalyst Cathode. *Adv. Mater.* **34**, 2200559 (2022).
3. Wang, Y., Zhou, J., Lin, C. *et al.* Decreasing the Overpotential of Aprotic Li-CO2 Batteries with the In-Plane Alloy Structure in Ultrathin 2D Ru-Based Nanosheets. *Adv. Funct. Mater.* **32**, 2202737 (2022).
4. Xu, S., Chen, C., Kuang, Y.*et al.* Flexible lithium–CO2 battery with ultrahigh capacity and stable cycling. *Energy Environ. Sci.* **11**, 3231 (2018).
5. Bie, S., Du, M., He, W. *et al.* Carbon Nanotube@RuO2 as a High Performance Catalyst for Li−CO2 Batteries. *ACS Appl. Mater. Interfaces* **11**, 5146.5151 (2019).
6. Wang, C., Shang, Y., Lu, Y. *et al.* Photoinduced homogeneous RuO2 nanoparticles on TiO2 nanowire arrays: A high-performance cathode toward flexible Li–CO2 batteries. *J. Power Sources*, **475**, 228703 (2020).
7. Xu, S., Ren, Z., Liu, X. *et al.* Carbonate decomposition: Low-overpotential Li-CO2 battery based on interlayer-confined monodisperse catalyst. *Energy Storage Mater.* **15**,291–298 (2018).
8. Deng, Q., Yang, Y., Mao, C. *et al.* Electronic State Modulation and Reaction Pathway Regulation on Necklace-Like MnOx-CeO2@Polypyrrole Hierarchical Cathode for Advanced and Flexible Li–CO2 Batteries. *Adv. Energy Mater.* **12**, 2103667 (2022).
9. Li, X., Wang, H., Chen, Z. *et al.* Covalent-Organic-Framework-Based Li–CO2 Batteries. *Adv. Mater.* **31**, 1905879 (2019).
10. Liang, H., Zhang, Y., Chen, F. *et al.* A novel NiFe@NC-functionalized N-doped carbon microtubule network derived from biomass as a highly efficient 3D free-standing cathode for Li-CO2 batteries. *App. Catal. B: Environ.* **244**, 559–567 (2019).
11. Zhang, Z., Zhang, Z., Liu, P. *et al.* Identification of cathode stability in Li–CO2 batteries with Cu nanoparticles highly dispersed on N-doped graphene. *J. Mater. Chem. A*. **6**, 3218 (2018).
12. Li, J., Wang, L., Zhao, Y. *et al.* Li-CO2 Batteries Efficiently Working at Ultra-Low Temperatures. *Adv. Funct. Mater.* **30**, 2001619 (2020).
13. Li, X., Zhou, J., Zhang, J. *et al.* Bamboo-Like Nitrogen-Doped Carbon Nanotube Forests as Durable Metal-Free Catalysts for Self-Powered Flexible Li–CO2 Batteries. *Adv. Mater.* **31**, 1903852 (2019).
14. Bie, S., Du, M., He, W. *et al.* Carbon Nanotube@RuO2 as a High Performance Catalyst for Li–CO2 Batteries. *ACS Appl. Mater. Inter.* **11**, 5146-5151 (2019).
15. Hu, C., Gong, L., Xiao, Y. *et al.* High-Performance, Long-Life, Rechargeable Li–CO2 Batteries based on a 3D Holey Graphene Cathode Implanted with Single Iron Atoms. *Adv. Mater.* **32**, 1907436 (2020).
16. Guo, Z., Li, J., Qi, H. *et al*. A Highly Reversible Long-Life Li–CO2 Battery with a RuP2-Based Catalytic Cathode. Small, **15**, 1803246 (2019).
17. Zhang, Z., Yang, C., Wu, S. *et al*. Exploiting Synergistic Effect by Integrating Ruthenium–Copper Nanoparticles Highly Co-Dispersed on Graphene as Efficient Air Cathodes for Li–CO2 Batteries, Adv. Energy Mater. **9**, 1802805 (2019).
18. Li, C., Guo, Z., Yang, B. *et al*. A Rechargeable Li-CO2 Battery with a Gel Polymer Electrolyte. *Angew. Chem. Int. Ed.* **56**, 9126 –9130 (2017).
19. Song, L., Hu, C., Xiao, Y. *et al*. An ultra-long life, high-performance, flexible Li–CO2 battery based on multifunctional carbon electrocatalysts. *Nano Energy*. **71**, 104595 (2020).
20. Wang, S., Wang, J., Liu, J. *et al*. Ultra-fine surface solid-state electrolytes for long cycle life all-solid-state lithium–air batteries. *J. Mater. Chem. A*. **6**, 21248 (2018).
21. Du, Y., Liu, Y., Yang, S. *et al*. A rechargeable all-solid-state Li–CO2 battery using a Li1.5Al0.5Ge1.5(PO4)3 ceramic electrolyte and nanoscale RuO2 catalyst. *J. Mater. Chem. A*. **9**, 9581 (2021).
22. Song, H., Wang, S., Song, X. *et al*. Solar-driven all-solid-state lithium–air batteries operating at extreme low temperatures. *Energy Environ. Sci.* **13**, 1205 (2020).
23. Wang, S., Song, H., Song, X. *et al*. An extra-wide temperature all-solid-state lithium-metal battery operating from − 73℃ to 120℃. *Energy Storage Mater.* **39**, 139–145 (2021).
24. Li, J., Wang, L., Zhao, Y. *et al*. Li-CO2 Batteries Efficiently Working at Ultra-Low Temperatures. *Adv. Funct. Mater*. **30**, 2001619 (2020).
25. Wang, S., Xu, K., Song, H. *et al*. A High-Energy Long-Cycling Solid-State Lithium-Metal Battery Operating at High Temperatures. *Adv. Energy Mater*. **12**, 2201866 (2022).
26. Wang, S., Song, H., Zhu, T. *et al*. An ultralow-charge-overpotential and long-cycle-life solid-state Li-CO2 battery enabled by plasmon-enhanced solar photothermal catalysis. *Nano Energy*. **100,** 107521 (2022).
27. Wang, R., Zhang, X., Cai, Y. *et al*. Safety-reinforced rechargeable Li-CO2 battery based on a composite solid state electrolyte. *Nano Res*. **12**, 2543–2548 (2019).
28. Yoon, B., Beak, J., Na, D. *et al*. Li1.4Al0.4Ge0.1Ti1.5(PO4)3: A stable solid electrolyte for Li-CO2 batteries. *Mater. Chem. Phys.* **322**, 129583 (2024).
29. Savunthari, K., Chen, C., Chen, Y. *et al*. Effective Ru/CNT Cathode for Rechargeable Solid-State Li.CO2 Batteries. *ACS Appl. Mater. Interfaces* **13**, 44266-44273 (2021).
30. Ahmadiparidari, A., Warburton, R., Majidi, L. *et al*. A Long-Cycle-Life Lithium–CO2 Battery with Carbon Neutrality. *Adv. Mater*. **31**, 1902518 (2019).
31. Pipes, R., He, J., Bhargav, A. *et al*. Efficient Li−CO2 Batteries with Molybdenum Disulfide Nanosheets on Carbon Nanotubes as a Catalyst. *ACS Appl. Energy Mater.* **2**, 8685-8694 (2019).
32. Naik, K., Chourasia, A., Sharma, C. Nano-interface engineering of NiFe2O4/MoS2/MWCNTs heterostructure catalyst as cathodes in the Long-Life reversible Li-CO2 Mars batteries. *Chem. Eng. J*. **490**, 151729 (2024).
33. Lu, B., Chen, B., Wang. D. *et al*. Engineering the interfacial orientation of MoS2/Co9S8 bidirectional catalysts with highly exposed active sites for reversible Li-CO2 batteries. Pnas. **6**, 120 (2023).
34. Hu, T., Lian, W., Hu, K. *et al.* Photo-Energized MoS2/CNT Cathode for High-Performance Li–CO2 Batteries in a Wide-Temperature Range. *Nano-Micro Lett.* **17**, 5 (2025).
35. Chen, C., Huang, C., Huang, Y. *et al*. Catalytically Active Site Identification of Molybdenum Disulfide as Gas Cathode in a Nonaqueous Li-CO2 Battery. *ACS Appl. Mater. Interfaces* **13**, 6156-6167 (2021).
36. S. Wang, K. Xu, H. Song, T. Zhu, Z. Yu, X. Song, D. Li, L. Yu, J. Xu, K. Chen, A High-Energy Long-Cycling Solid-State Lithium-Metal Battery Operating at High Temperatures. Adv. Energy Mater. 2022, 12, 2201866.
37. Sun, X., Wang, D., Wen, Z. *et al*. An inorganic molten salt electrolyte-based Li–CO2 battery with moderate working temperature and enhanced performance. Chem. Commun. **60**, 8772 (2024).
38. Wang, D., Yang, J., He, p. *et al*. A low-charge-overpotential lithium-CO2 cell based on a binary molten salt electrolyte. *Energy Environ. Sci.* **14**, 4107 (2021).
39. Zhu, T., Wang, S., Yu, Z. *et al*. High-Performance Li-CO2 Battery Based on Carbon-Free Porous Ru@QNFs Cathode. *Small* **19**, 2301498 (2023).
40. Song, R., Han, J., Tian, S. *et al*. A multi-site strategy for boosting Li-CO2 batteries performance. *J. Power Sources* **626**, 235763 (2025).
